# Supplementary material
Source: PubMed Central journal article supplement (PMC4532544)
Supplement: NIHMS681926-supplement-2.pdf [file NIHMS681926-supplement-2.pdf]

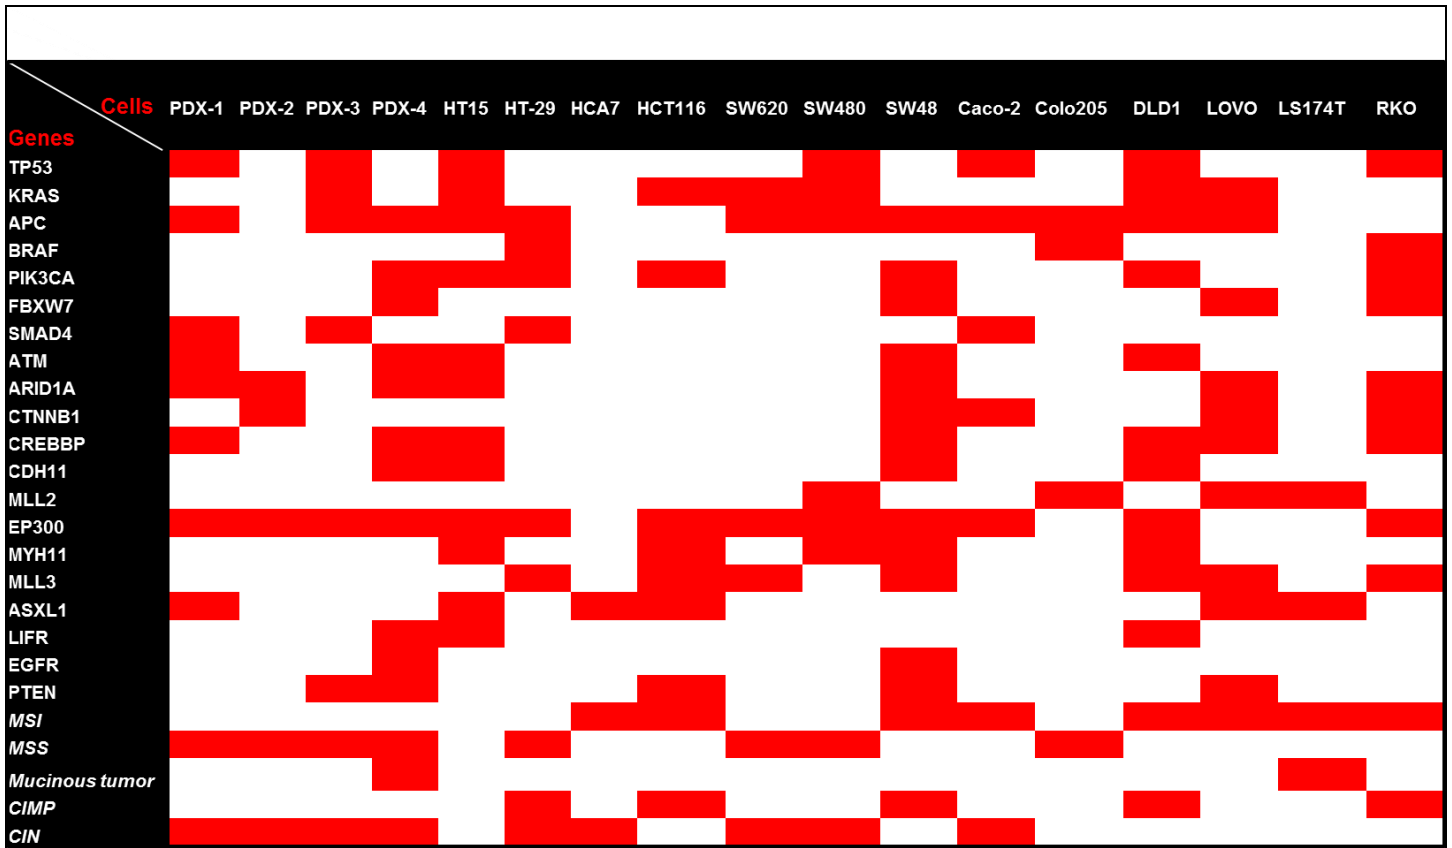

**Supplementary Table 1**

**Mutation Profiles of CTMM CRC cell lines.**

The mutation status of 17 CTMM cell lines for the twenty most commonly somatically altered genes in human CRC (COSMIC Database, <http://cancer.sanger.ac.uk>) is given. The presence of a somatic mutation is indicated by a red bar. Whole exome sequencing analysis was performed for PDX-1 through 4, Caco-2 and HT15. PDX-3 and PDX-4 were previously described as CCIC-1 and CCIC-2<sup>7</sup>. For the other cell lines, mutation status was previously described in the Cancer Cell Line Encyclopedia (<http://www.broadinstitute.org/software/cprg/?q=node/11>). Cell lines were classified as MSI, microsatellite instability; MSS, microsatellite stable; Mucinous, mucinous adenocarcinoma histopathology; CIMP, CpG Island Methylator Phenotype; CIN, chromosomal instability pathway.

| Cells            | Mice # | Mean progression (Week) | GI tumor incidence (%) | GI tumor Locations     | Mean GI tumor /mouse |
|------------------|--------|-------------------------|------------------------|------------------------|----------------------|
| Parental HT-15   | 9      | 7.8                     | 0                      | NA                     | 0                    |
| CCR9 HT-15       | 9      | 6.5                     | 67%                    | small intestine, Colon | 2.3 ± 0.17 *         |
| Parental HT-29   | 8      | 7.7                     | 37%                    | small intestine        | 0.3 ± 0.17           |
| CCR9 HT-29       | 8      | 5.8                     | 100%                   | small intestine, Colon | 3.7 ± 0.34 *         |
| Parental HCA7    | 8      | 7.6                     | 0                      | NA                     | 0                    |
| CCR9 HCA7        | 8      | 5.9                     | 63%                    | small intestine, colon | 3.8 ± 0.28 *         |
| Parental HCT116  | 8      | 5.7                     | 0                      | NA                     | 0                    |
| CCR9 HCT116      | 8      | 5.2                     | 75%                    | small intestine, colon | 3.6 ± 0.30 *         |
| Parental SW620   | 8      | 6.6                     | 0                      | NA                     | 0                    |
| CCR9SW620        | 8      | 5.3                     | 75%                    | small intestine, colon | 3.6 ± 0.38 *         |
| Parental SW480   | 8      | 7.1                     | 0                      | NA                     | 0                    |
| CCR9 SW480       | 8      | 6.5                     | 88%                    | small intestine, colon | 3.1 ± 0.28 *         |
| Parental SW48    | 8      | 7.4                     | 0                      | NA                     | 0                    |
| CCR9 SW48        | 8      | 6.0                     | 50%                    | small intestine        | 2.0 ± 0.27 *         |
| Parental Caco-2  | 8      | 9.2                     | 0                      | NA                     | 0                    |
| CCR9 Caco-2      | 8      | 7.5                     | 38%                    | small intestine, colon | 1.7 ± 0.19           |
| Parental Colo205 | 8      | 7.2                     | 0                      | NA                     | 0                    |
| CCR9 Colo205     | 8      | 5.8                     | 75%                    | small intestine, colon | 3.0 ± 0.33 *         |
| Parental DLD1    | 8      | 8.2                     | 0                      | NA                     | 0                    |
| CCR9 DLD1        | 8      | 5.7                     | 88%                    | small intestine, colon | 3.7 ± 0.33 *         |
| Parental LoVo    | 8      | 6.6                     | 0                      | NA                     | 0                    |
| CCR9 LoVo        | 8      | 5.1                     | 100%                   | small intestine, colon | 4.3 ± 0.37 *         |
| Parental LS174T  | 8      | 7.8                     | 0                      | NA                     | 0                    |
| CCR9 LS174T      | 8      | 6.1                     | 88%                    | small intestine, colon | 3.6 ± 0.26 *         |
| Parental RKO     | 8      | 5.8                     | 0                      | NA                     | 0                    |
| CCR9 RKO         | 8      | 6.7                     | 25%                    | small intestine        | 1.5 ± 0.71           |
| Parental PDX-1   | 8      | 8.2                     | 0                      | NA                     | 0                    |
| CCR9 PDX-1       | 8      | 6.3                     | 88%                    | small intestine, colon | 4.3 ± 0.31 *         |
| Parental PDX-2   | 9      | 9.2                     | 0                      | NA                     | 0                    |
| CCR9 PDX-2       | 9      | 6.8                     | 56%                    | small intestine, colon | 2.4 ± 0.38 *         |
| Parental CT26    | 10     | 7.1                     | 0                      | NA                     | 0                    |
| CCR9 CT26        | 12     | 6.5                     | 75%                    | small intestine, colon | 3.6 ± 0.58 *         |

**Supplementary Table 2**

**Inducible CCR9+ CRCs form orthotopic xenograft tumors in mouse intestine.**

Colorectal and small intestine tumors formed in mice injected with cells infected with CCR9+ vector or backbone control vector by tail vein. Asterisks denote statistically significant differences between CCR9+ and control groups. \* P < 0.01 compared to parental control groups by 2-sided MW test.

| Cells                                                                 | HT15   | HT-29  | HCA7   | HCT116 | SW620  | SW480  | SW48   | Caco-2 | Colo205 | DLD1   | LoVo   | LS174T | RKO    | PDX-1  | PDX-2  | CT26   | All lines     |
|-----------------------------------------------------------------------|--------|--------|--------|--------|--------|--------|--------|--------|---------|--------|--------|--------|--------|--------|--------|--------|---------------|
| <b>statistics tests</b>                                               |        |        |        |        |        |        |        |        |         |        |        |        |        |        |        |        |               |
| <b>(Fig. 1 A.<br/>Colon tumor: control VS<br/>CCR9+)</b>              |        |        |        |        |        |        |        |        |         |        |        |        |        |        |        |        |               |
| Name of Statistics test                                               | MW      | MW     | MW     | MW     | MW     | MW     | MW     | MW     | Paired t-test |
| P values                                                              | 0.038  | 0.017  | 0.038  | 0.015  | 0.016  | 0.016  | 0.076  | 0.085  | 0.016   | 0.038  | 0.006  | 0.015  | 0.191  | 0.038  | 0.017  | 0.007  | 0.0001        |
| <b>(Supplementary Table 2.<br/>GI tumor: control VS<br/>CCR9+)</b>    |        |        |        |        |        |        |        |        |         |        |        |        |        |        |        |        |               |
| Name of Statistics test                                               | MW      | MW     | MW     | MW     | MW     | MW     | MW     | MW     | Paired t-test |
| P values                                                              | 0.005  | 0.007  | 0.013  | 0.004  | 0.004  | 0.001  | 0.032  | 0.076  | 0.004   | 0.001  | 0.0004 | 0.001  | 0.171  | 0.001  | 0.014  | 0.001  | 0.0001        |
| <b>(Supplementary Fig. 1 C<br/>migration: control VS CCR9+)</b>       |        |        |        |        |        |        |        |        |         |        |        |        |        |        |        |        |               |
| Name of Statistics test                                               | t-test  | t-test | t-test | t-test | t-test | t-test | t-test | t-test | t-test        |
| P values                                                              | 0.01   | 0.006  | 0.026  | 0.01   | 0.011  | 0.01   | 0.018  | 0.006  | 0.004   | 0.003  | 0.007  | 0.03   | 0.009  | 0.007  | 0.017  | 0.02   | 0.001         |
| <b>Cells</b>                                                          |        |        |        |        |        |        |        |        |         |        |        |        |        |        |        |        |               |
| <b>statistic tests</b>                                                |        |        |        |        |        |        |        |        |         |        |        |        |        |        |        |        |               |
| <b>(Fig. 3D<br/>Liver tumor # : control VS CCR9+)</b>                 |        |        |        |        |        |        |        |        |         |        |        |        |        |        |        |        |               |
| Name of Statistics test                                               |        |        |        |        |        |        |        |        |         |        |        |        |        |        |        |        | t-test        |
| P values                                                              |        |        |        |        |        |        |        |        |         |        |        |        |        |        |        |        | 0.001         |
| <b>(Fig. 3E<br/>tumor progress time: GI VS liver)</b>                 |        |        |        |        |        |        |        |        |         |        |        |        |        |        |        |        |               |
| Name of Statistics test                                               |        |        |        |        |        |        |        |        |         |        |        |        |        |        |        |        | t-test        |
| P values                                                              |        |        |        |        |        |        |        |        |         |        |        |        |        |        |        |        | 0.001         |
| <b>(Supplementary Fig. 8A<br/>liver tumor #: CCR9 on VS CCR9 off)</b> |        |        |        |        |        |        |        |        |         |        |        |        |        |        |        |        |               |
| Name of Statistics test                                               |        |        |        |        |        |        |        |        |         |        |        |        |        |        |        |        | t-test        |
| P values                                                              |        |        |        |        |        |        |        |        |         |        |        |        |        |        |        |        | 0.001         |
| <b>Supplementary Table 3</b>                                          |        |        |        |        |        |        |        |        |         |        |        |        |        |        |        |        |               |
| <b>Statistics Tests and P values in Figures</b>                       |        |        |        |        |        |        |        |        |         |        |        |        |        |        |        |        |               |
